# Supplementary material for: NOMA-MIMO in 5G network: a detailed survey on enhancing data rate
Source: PeerJ journal article supplement (doi:10.7717/peerj-cs.2388), 2025-01-31
Supplement: Payment.pdf [file Payment.pdf]

**Straight2Bank**  
**PAYEE ADVICE**

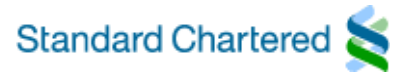

SCB Ref : MY11064R2351666  
Customer Ref : 2000018598243201  
Date : 08/11/2024  
To: PEERJ, INC

US  
/UNITED STATES

|                      |                  |
|----------------------|------------------|
| <b>Invoice Total</b> | <b>2,443.00</b>  |
| - Benef. Charge      | 0.00             |
| - Discount           | 0.00             |
| UTR Reference        | ST25962411080341 |

Dear Sir / Madam (s),

We have on 08/11/2024 made a payment to your account xxxxxxxx0870 at CHOICE FINANCIAL GROUP for USD 2,443.00 as instructed by UNIVERSITI TELEKOM SDN. BHD..

Should you not receive the payment in time, please contact UNIVERSITI TELEKOM SDN. BHD. for further investigations.

---

Remittance Advice

This section includes details as supplied by UNIVERSITI TELEKOM SDN. BHD.

Payment Details :

---

| Reference    | Date       | Description                                            | Amount ( USD ) |
|--------------|------------|--------------------------------------------------------|----------------|
| 09132024-982 | 13/09/2024 | 09132024-98284 : 09132024-98284 PC/2024/166109 Mardeni | 2,443.00       |

---

**Straight2Bank**  
**MT103 PAYEE ADVICE**

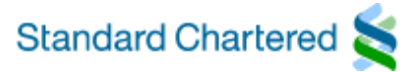

ScbRef: MY11064R2351666

CustRef: 2000018598243201

Date: 08/11/2024 11:05

Dear Sir / Madam (s),

Please be advised that the following payment has been made to your account on behalf of

**UNIVERSITI TELEKOM SDN. BHD.**

Payment Details

|     |                                                                                                                                  |
|-----|----------------------------------------------------------------------------------------------------------------------------------|
| 20  | ST25962411080341                                                                                                                 |
| 23B | CRED                                                                                                                             |
| 32A | 241108 USD 2443,00                                                                                                               |
| 33B | USD 2443,00                                                                                                                      |
| 36  | 0,000000                                                                                                                         |
| 50K |                                                                                                                                  |
|     | UNIVERSITI TELEKOM SDN. BHD.<br>TRAINING ROOM NO.2,LEVEL 2,TM<br>CONVERSATION CENTER,50672,JALAN<br>PANTAI BAHARU, KUALA LUMPUR. |
| 57A | CHFGUS44021                                                                                                                      |
| 59  | /xxxxxxxx0870<br>PEERJ, INC<br>US<br>/UNITED STATES                                                                              |
| 71A | OUR                                                                                                                              |
| 71F | 0,00                                                                                                                             |
| 71G | 0,00                                                                                                                             |
